## Letter

### **An unconventional NOI/RIN4 domain of a rice NLR protein binds host EXO70 protein to confer fungal immunity**

**Koki Fujisaki<sup>1</sup>, Yoshiko Abe<sup>1</sup>, Eiko Kanzaki<sup>1</sup>, Kazue Ito<sup>1</sup>, Hiroe Utsushi<sup>1</sup>,  
Hiromasa Saitoh<sup>2</sup>, Aleksandra Białas<sup>3</sup>, Mark J Banfield<sup>4</sup> Sophien Kamoun<sup>3</sup>, Ryohei  
Terauchi<sup>1,5</sup>**

#### **Affiliation**

**1** Iwate Biotechnology Research Center, Kitakami, Iwate, Japan, **2** Department of Molecular Microbiology, Tokyo University of Agriculture, Setagaya, Tokyo, Japan, **3** The Sainsbury Laboratory, Norwich Research Park, Norwich, UK, **4** Dept. of Biological Chemistry, John Innes Centre, Norwich Research Park, Norwich, UK, **5** Laboratory of Crop Evolution, Kyoto University, Muko, Kyoto, Japan

1       A subset of plant nucleotide-binding domain and leucine-rich repeat-containing  
2 (NLR) proteins carry extraneous integrated domains that have been proposed to mediate  
3 pathogen effector recognition. The current view is that these unconventional domains  
4 function by directly binding or serving as substrates for pathogen effectors, yet only a  
5 few domains have been functionally characterized to date. Here we report that the  
6 integrated NOI domain of the rice NLR protein Pii-2, together with its partner Pii-1,  
7 mediates immunity to the rice blast fungus *Magnaporthe oryzae* by indirect recognition  
8 of the AVR-Pii effector. We discovered that the Pii-2 NOI domain does not physically  
9 interact with the effector itself but instead binds the host protein OsExo70-F3, which is  
10 a target of AVR-Pii. We further identified mutations within the NOI core motif  
11 (PxFGxW) of Pii-2 that abolish both OsExo70-F3 binding and *Pii*-mediated resistance  
12 to *M. oryzae* expressing AVR-Pii. This led us to propose a novel conceptual model in  
13 which an NLR-integrated domain functions to detect host proteins targeted by pathogen  
14 effectors, in a framework that extends classical indirect recognition models.

15 (174 words)

16  
17       Plants have evolved immune receptors to defend against pathogen infection. These  
18 include cytosolic nucleotide-binding domain and leucine-rich repeat-containing (NLR)  
19 proteins that recognize pathogen avirulence (AVR) effectors and activate a complex  
20 immune response that includes hypersensitive cell death. Plant NLRs have a modular  
21 architecture comprising either an N-terminal coiled-coil (CC) or a Toll/interleukin-1  
22 receptor (TIR) homology domain, followed by nucleotide binding (NB) and leucine rich

23 repeat (LRR) domains. To date, several reports have shown that genetically-linked NLR  
24 pairs (e.g., *RPS4/RPS1*, *RGA4/RGA5* and *Pikp-1/Pikp-2*) are required to act together for  
25 the recognition of cognate AVRs. Of these pairs, one NLR is a sensor NLR that  
26 perceives pathogen effectors while the other is a helper NLR that is necessary to  
27 activate immune signaling (ref. 1,2). A number of sensor NLRs, perhaps as many as  
28 10%, have recently been reported to contain additional unconventional domains called  
29 integrated domains (IDs) that appear to have originated from host targets of effectors  
30 (ref. 3,4). The current view is that NLR-integrated domains function as baits or decoys  
31 that bind pathogen effectors or serve as substrates of effectors, in order to detect  
32 invading pathogens. One example is *Arabidopsis* RRS1, an NLR that carries a  
33 C-terminal domain with similarity to WRKY transcriptional factors. RRS1 is required  
34 for the perception of bacterial effectors PopP2 and AvrRps4, which are bacterial  
35 effectors that target *Arabidopsis* WRKY proteins to enhance virulence. Therefore, Le  
36 Roux *et al.* (2015) concluded that a WRKY domain targeted by pathogen effectors has  
37 integrated into RRS1 to facilitate recognition of the bacterial effectors (ref. 5,6). Other  
38 examples include the rice NLR pairs Pia (*RGA4/RGA5*) and Pikp (*Pikp-1/Pikp-2*),  
39 which recognize the effectors AVR-Pia and AVR-PikD of the rice blast fungus,  
40 *Magnaporthe oryzae* (syn. *Pyricularia oryzae*), respectively. Remarkably, both RGA5  
41 and Pikp-1 include a Heavy Metal-Associated (HMA) domain integrated in different  
42 positions in these NLRs. Binding of the integrated HMA domain to the corresponding  
43 AVR effectors triggers the hypersensitive response and immunity to the blast fungus  
44 (ref. 7,8). These findings let to the proposal that unconventional integrated domains of

45 NLRs have evolved to directly bind pathogen effectors or serve as a substrate for the  
46 effectors's activity (ref. 9). As yet, the degree to which IDs associate with host proteins  
47 is largely unknown.

48

49 The *Pii* locus in rice encodes a pair of CC-NLR proteins, Pii-1 and Pii-2, that detect  
50 the *M. oryzae* effector AVR-Pii and mount an effective immune response against races  
51 of this pathogen that express AVR-Pii (ref. 10,11). Despite repeated attempts using  
52 various protein-protein interaction methods, we did not detect direct interaction between  
53 AVR-Pii and either one of Pii-1 and Pii-2 (ref. 12). Instead, we discovered that AVR-Pii  
54 binds two members of the large EXO70 protein family of rice, OsExo70F-2 and  
55 OsExo70F-3 (ref. 12). EXO70 is a subunit of the exocyst, an evolutionarily conserved  
56 vesicle tethering complex that functions in the last stage of exocytosis (ref. 13,14).  
57 Although we do not understand the degree to which AVR-Pii binding to EXO70  
58 contributes to virulence, we found that *OsExo70-F3* is genetically required for  
59 *Pii*-mediated immunity to *M. oryzae* expressing *AVR-Pii* (ref. 12). This led us to  
60 propose that Pii response to AVR-Pii follows the indirect recognition model, in which  
61 the NLR protein recognizes modifications of a host protein targeted by the effector (ref.  
62 12).

63 Here we report that Pii recognition of AVR-Pii follows a novel conceptual model of  
64 NLR perception of plant pathogens. We found that the 280 C-terminal amino acids of  
65 Pii-2 (Pii-2-CT) bind the rice protein OsExo70-F3 that is targeted by the AVR-Pii  
66 effector (Fig. 1, Supplementary Fig. 1, 2 and 3). We further delineated the interaction

67 region to the 103 amino acids at the C-terminus of the protein (Pii-2-CTC)  
68 (Supplementary Fig. 1, 2 and 3). Interestingly, this region of Pii-2 contains a short  
69 sequence with similarity to a core motif of nitrate-induced (NOI) domain (PxFGxW)  
70 that is also conserved in the *Pi5-2* which is allelic to *Pii-2* (Supplementary Fig. 3 and ref.  
71 3,15). The NOI domain also defines the *Arabidopsis* RPM1-INTERACTING  
72 PROTEIN4 (RIN4), which is known to negatively regulate plant defense and is targeted  
73 by bacterial effectors AvrRpt2, AvrB and AvrRpm1 (ref. 16). In fact, the protease  
74 effector AvrRpt2 cleaves RIN4 protein at the NOI motif PxFGxW. To further  
75 investigate the importance of the Pii-2 NOI motif, we introduced multiple mutations in  
76 this region and tested the resulting mutants for binding to OsExo70-F3 (Fig.1,  
77 Supplementary Fig. 4). Mutations in the NOI conserved residues, Pro(P), Phe(F) and  
78 Trp(W) abolished binding to OsExo70-F3 (Fig. 1, Supplementary Fig. 4 and 5). This  
79 indicates that the Pii-2 NOI core motif is required for OsExo70-F3 binding.

80

81 Next, we investigated the role of the NOI motif in *Pii*-mediated immunity. We  
82 determined the effect of mutations within the NOI core motif on *Pii*-mediated resistance  
83 to *M. oryzae* using genetic complementation of a *pii-2* loss-of-function rice line with  
84 *Pii-2* transgenes carrying the mutations in the NOI motif described above. To obtain a  
85 *pii-2* loss-of-function mutant rice, we screened 5,600 ethyl methanesulfonate (EMS)  
86 mutant lines of rice cultivar Hitomebore, which carries the *Pii* gene (ref. 17). This led to  
87 the identification of two *pii-2* loss-of-function mutants, Hit5882 and Hit13701, carrying  
88 an amino acid substitution (V371D) and a nonsense mutation (Q247stop) in the Pii-2

89 NB-domain, respectively (Supplementary Fig. 3; ref. 11). A full-length cDNA of  
90 wild-type *Pii-2* under the control of the 35S promoter (Hit5882+WT-*Pii-2*) transformed  
91 in Hit5882 complemented *Pii*-mediated resistance (Fig. 2). In contrast, transformation  
92 of Hit5882 with a full-length cDNA of *Pii-2* carrying the NOI-m5 mutation failed to  
93 confer *Pii*-dependent resistance in all transgenic lines tested (Hit5882+*Pii-2*-NOI-m5;  
94 Fig. 2). The *Pii-2*-NOI-m5 mutant also failed to complement the second  
95 *Pii*-loss-of-function rice line Hit13701 (Supplementary Fig. 6). Overall, our data  
96 genetically link *Pii-2* NOI motif binding to OsExo70-F3 with *Pii*-mediated resistance to  
97 *M. oryzae* expressing the AVR-*Pii* effector. This suggests that NOI binding to EXO70  
98 is crucial for *Pii* function.

99

100 The current view is that integrated domains of NLR immune receptors function by  
101 directly binding or serving as substrates for pathogen effectors. Our findings suggest  
102 that NLR-integrated domains may function by detecting host proteins targeted by  
103 pathogen effectors in a novel model in which an integrated domain of an NLR mediates  
104 indirect recognition of a pathogen effector (ref. 18,19) (Fig. 3). We hypothesize that the  
105 rice NLR *Pii-2* has integrated a NOI domain originating from a host NOI-EXO70  
106 complex targeted by AVR-*Pii*. This NOI integration has enabled *Pii* to monitor  
107 OsExo70-F3 *via* physical interaction, which allowed indirect detection of AVR-*Pii* (Fig.  
108 3). Recent reports showing RIN4-EXO70 interactions (ref. 20,21) support this  
109 hypothesis.

110

111 Our work also points to the NOI-EXO70 complex as a major target of plant pathogen  
112 effectors. These domains have therefore been acquired as sensor domains by NLR  
113 immune receptors, and both NOI and EXO70 are commonly seen integrated into NLRs  
114 (ref. 22, 23). Whether integrated NOI and EXO70 domains can mediate direct  
115 recognition of effectors remains to be determined. Nonetheless, our finding that  
116 NLR-integrated domains can indirectly detect AVR effectors expands the mechanistic  
117 view of pathogen detection by immune receptors—that the interactors of  
118 NLR-integrated domains can be either pathogen effectors, or host proteins that are  
119 targeted by effectors. This work shows the first example of indirect pathogen  
120 recognition *via* an integrated NLR, highlighting how the arms race between plants and  
121 pathogens has driven the emergence of a wealth of molecular interactions and  
122 mechanisms in the fight for survival.

123

## 124 **Methods**

### 125 **Plasmids and Plants**

126 The primers and their sequences used for plasmid constructions are listed in  
127 Supplementary Table 1. For Y2H assay, OsExo70-F3 in pGADT7 (prey vector),  
128 *Pii-1-CC*, *Pii-1-NB*, *Pii-1-LRR+CT*, *Pii-2-CC*, *Pii-2-NB* and *Pii-2-LRR+CT* in  
129 pGBKT7 (bait vector) have been previously constructed (ref. 17). To construct  
130 pGBKT7-Pii-2-CT and pGBKT7-Pii-2-CTC, *Pii-2-CT* and *Pii-2-CTC* fragments were  
131 amplified by PCR using primer sets: KF825f/KF826r and KF827f/KF826r, respectively,  
132 and inserted into pGBKT7 vector by utilizing *EcoRI* and *BamHI* sites. To prepare bait  
133 vectors of the *Pii-2-CT* mutant, *Pii-2-CT-m5*, the N-terminal half and the C-terminal  
134 half of *Pii-2-CT* fragment were amplified by using primer sets (KF825f/KF831r and  
135 KF830f/KF826r, respectively), and resulting PCR products were mixed and used as  
136 DNA template for second PCR using a primer set (KF825f /KF826r) to amplify  
137 *Pii-2-CT-m5* fragment. Similarly, to construct other pGBKT7-Pii-2-CT mutants, primer  
138 sets (1<sup>st</sup> PCR : KF825f/KF833r for *Pii-2-CT-VA-N* and KF832f/KF826r for  
139 *Pii-2-CT-VA-C*; KF825f/KF835r for *Pii-2-CT-PA-N* and KF834f/KF826r for  
140 *Pii-2-CT-PA-C*; KF825f/KF837r for *Pii-2-CT-FA-N* and KF836f/KF826r for  
141 *Pii-2-CT-FA-C*; KF825f/KF839r for *Pii-2-CT-GA-N* and KF838f/KF826r for  
142 *Pii-2-CT-GA-C*; KF825f/KF841r for *Pii-2-CT-WA-N* and KF840f/KF826r for  
143 *Pii-2-CT-WA-C*) were used for PCR to amplify the N- and C-terminal half fragments of  
144 *Pii-2-CT* mutants. The N- and C-terminal half fragments of each *Pii-2-CT* mutants were  
145 mixed and used as DNA template for second PCR using a primer set (KF825f /KF826r).



146 After the second PCR, the resulting 0.85 kb PCR products were inserted into pGBKT7  
147 vector by utilizing *EcoRI* and *BamHI* sites.

148 For preparing the expression vectors in rice, full-length coding sequences of *Pii-2*  
149 was amplified from cDNA by PCR using primer set, KF828f/KF829r, and was  
150 introduced into pCAMBIA1300S vector (Cambia, [www.cambia.org](http://www.cambia.org)) by utilizing *KpnI*  
151 and *XbaI* sites (pCAMBIA-Pii-2). To construct expression vector for Pii-2 mutant  
152 (Pii-2-NOI-m5), two *Pii-2* fragments were amplified by using primer sets  
153 (KF828f/KF831r and KF830f/KF829r, respectively), and resulting PCR products were  
154 mixed and used as DNA template for the second PCR using a primer set (KF828f  
155 /KF829r) to amplify *Pii-2-NOI-m5* fragment. The *Pii-2-NOI-m5* fragment was inserted  
156 into pCAMBIA1300S vector (Cambia, [www.cambia.org](http://www.cambia.org)) by utilizing *KpnI* and *XbaI*  
157 sites (pCAMBIA-Pii-2-NOI-m5).

158 To prepare transgenic rice plants expressing wild-type *Pii-2* and mutant *Pii-2*  
159 (Pii-2-NOI-m5), pCAMBIA-Pii-2 and pCAMBIA-Pii-2-NOI-m5 were introduced into  
160 *Agrobacterium tumefaciens*, which were used for transformation of Hit5882 and  
161 Hit13701 that are *pii-2* deficient mutants of the rice cultivar Hitomebore (ref. 11).

162

### 163 **Yeast two-hybrid assay**

164 Y2H assay was performed as described previously (ref. 24). Ten-times dilution series  
165 [OD<sub>600</sub> = 3.0 (x1), 0.3 (x10<sup>-1</sup>) and 0.03 (x10<sup>-2</sup>)] of yeast cells were prepared and spotted  
166 onto quadruple dropout medium (QDO); basal medium lacking Trp, Leu, Ade and His  
167 but containing 5-Bromo-4-Chloro-3-indolyl  $\alpha$ -D-galactopyranoside (X-a-gal)

168 (Clontech). To detect interactions, both QDO medium with or without 10 mM  
169 3-amino-1,2,4-triazole (3AT) (Sigma) was used. Yeast cells were also spotted onto  
170 double dropout medium (DDO); basal medium lacking Trp, Leu to test cell viability. To  
171 check protein accumulation in yeast cells, yeast cells were propagated in liquid DDO at  
172 30°C overnight. Forty mg yeast cells were collected and resuspended with 160 µl GTN  
173 + DC buffer [10% glycerol, 25mM Tris-HCl (pH 7.5), 150mM NaCl, 1 mM DTT and 1  
174 tablet of complete EDTA-free (Roche, Basel Switzerland)]. Then, 160 µl of 0.6 N  
175 NaOH was added, mixed gently, and incubated at room temperature for 10 min. Next,  
176 160 µl of gel sample buffer [40%(w/v) glycerol, 240 mM Tris-HCl pH 6.8, 8% (w/v)  
177 SDS, 0.04% (w/v) bromophenol blue, 400 mM DTT] was added and incubated at 95 °C  
178 for 5 min. After 20,000 x g centrifugation for 5 min, the supernatant was subjected to  
179 SDS-PAGE. Proteins expressed from bait and prey vectors were immunologically  
180 detected by using anti-Myc antibody (MBL, Nagoya, Japan) and anti-HA 3F10 (Roche),  
181 respectively.

182

### 183 **Assays for fungal pathogenicity and gene expression**

184 Wild-type *M. oryzae* isolate Sasa2 (no AVR-Pii) is stored at Iwate Biotechnology  
185 Research Center, and a transgenic *M. oryzae* strain (Sasa2+AVR-Pii-s) was previously  
186 established as Sasa2(+22p:pex33) (ref. 17). Rice leaf blade spot inoculation with  
187 conidial suspension ( $5 \times 10^5$  conidia/ml) was performed as described previously (ref.  
188 24). Disease lesions were photographed at 10 days after inoculation, and vertical length  
189 of the lesions was measured. To check *Pii-2* expression in transgenic rice plants,

190 semi-quantitative RT-PCR was performed as described previously (ref.12). Messenger  
191 RNA from *Pii-2* transgene but not from intrinsic gene was specifically detected by  
192 using a primer set (5'-CTTTCGCGAGCTCGGTACCAACAATG-3' and  
193 5'-ATCCACATCATTGTAACAATAG-3'). As a control, rice *Actin* was detected by  
194 using a primer set (5'- CTGAAGAGCATCCTGTATTG -3' and 5'-  
195 GAACCTTTCTGCTCCGATGG -3').

196

197

198

199 **References**

- 200 1. Baggs, E., Dagdas, G. and Krasileva, KV. (2017) [NLR diversity, helpers and](#)  
201 [integrated domains: making sense of the NLR IDentity](#). *Curr. Opin. Plant Biol.* 38,  
202 59-67.
- 203 2. Cesari, S.(2017) [Multiple strategies for pathogen perception by plant immune](#)  
204 [receptors](#). *New Phytol.* doi:10.1111/nph.14877.
- 205 3. Cesari, S., Bernoux, M., Moncuquet, P., Kroj, T. and Dodds, P.N. (2014) [A novel](#)  
206 [conserved mechanism for plant NLR protein pairs: the "integrated decoy"](#)  
207 [hypothesis](#). *Front Plant Sci.* 5, 606.
- 208 4. Wu, C.H., Krasileva, K, V., Banfield, M. J., Terauchi, R., and Kamoun, S. (2015)  
209 The "sensor domains" of plant NLR proteins: more than decoys. *Front Plant Sci.*  
210 6,134.
- 211 5. Le Roux, C., Huet, G., Jauneau, A., Camborde, L., Trémousaygue, D., Kraut, A.,  
212 Zhou, B., Levailant, M., Adachi, H., Yoshioka, H., Raffaele, S., Berthomé, R.,  
213 Couté, Y., Parker, J.E. and Deslandes, L. (2015) [A receptor pair with an integrated](#)  
214 [decoy converts pathogen disabling of transcription factors to immunity](#). *Cell.* 161,  
215 1074-1088.
- 216 6. Sarris, P.F., Duxbury, Z., Huh, S.U., Ma, Y., Segonzac, C., Sklenar, J., Derbyshire,  
217 P., Cevik, V., Rallapalli, G., Saucet, S.B., Wirthmueller, L., Menke, F.L., Sohn, K.H.  
218 and Jones, J.D. (2015) [A Plant Immune Receptor Detects Pathogen Effectors that](#)  
219 [Target WRKY Transcription Factors](#). *Cell.* 161, 1089-1100.

- 220 7. Cesari, S., Thilliez, G., Ribot, C., Chalvon, V., Michel, C., Jauneau, A., Rivas, S.,  
221 Alaux, L., Kanzaki, H., Okuyama, Y., Morel, J.B., Fournier, E., Tharreau, D.,  
222 Terauchi, R. and Kroj, T. (2013) [The rice resistance protein pair RGA4/RGA5](#)  
223 [recognizes the Magnaporthe oryzae effectors AVR-Pia and AVR1-CO39 by direct](#)  
224 [binding](#). *Plant Cell* 25, 1463-1481.
- 225 8. Maqbool, A., Saitoh, H., Franceschetti, M., Stevenson, C.E., Uemura, A., Kanzaki,  
226 H., Kamoun, S., Terauchi, R. and Banfield, M.J. (2015) [Structural basis of pathogen](#)  
227 [recognition by an integrated HMA domain in a plant NLR immune receptor](#). *Elife*.  
228 25, 4.
- 229 9. Kroj, T., Chanclud, E., Micel-Romiti, C., Grand, X. and Morel, JB. (2016)  
230 [Integration of decoy domains derived from protein targets of pathogen effectors into](#)  
231 [plant immune receptors is widespread](#). *New Phytol.* 210, 618-626.
- 232 10. Takagi, H., Uemura, A., Yaegashi, H., Tamiru, M., Abe, A., Mitsuoka, C., Utsushi,  
233 H., Natsume, S., Kanzaki, H., Matsumura, H., Saitoh, H., Yoshida, K., Cano, L.M.,  
234 Kamoun, S. and Terauchi, R. (2013) [MutMap-Gap: whole-genome resequencing of](#)  
235 [mutant F2 progeny bulk combined with de novo assembly of gap regions identifies](#)  
236 [the rice blast resistance gene Pii](#). *New Phytol.* 200, 276-283
- 237 11. Takagi, H., Abe, A., Uemura, A., Oikawa, K., Utsushi, H., Yaegashi, H., Shimizu,  
238 M., Abe, Y., Kanzaki, H., Saitoh, H., Terauchi, R. and Fujisaki, K. (2017) Rice blast  
239 resistance gene *Pii* is controlled by a pair of NBS-LRR genes *Pii-1* and *Pii-2*.  
240 *bioRxiv* doi. <https://doi.org/10.1101/227132>
- 241 12. Fujisaki, K., Abe, Y., Ito, A., Saitoh, H., Yoshida, K., Kanzaki, H., Kanzaki, E.,

- 242 Utsushi, H., Yamashita, T., Kamoun, S. and Terauchi, R. (2015) [Rice Exo70](#)  
243 [interacts with a fungal effector, AVR-Pii, and is required for AVR-Pii-triggered](#)  
244 [immunity](#). *Plant J.* 83, 875-887.
- 245 13. Heider, MR. and Muson, M. (2012) Exorcising the exocyst complex. *Traffic* 13,  
246 898-907.
- 247 14. Zhang, Y., Liu, CM., Emons, AM. and Ketelaar, T. (2010) The plant exocyst. *J.*  
248 *Integr. Plant Biol.* 52, 138-146.
- 249 15. Nishimura, M.T., Monteiro, F. and Dangl, J.L. (2015) [Treasure your exceptions:](#)  
250 [unusual domains in immune receptors reveal host virulence targets](#). *Cell.* 161,  
251 957-60.
- 252 16. Kim, M.G., da Cunha, L., McFall, A.J., Belkadir, Y., DebRoy, S., Dangl, J.L. and  
253 Mackey, D. (2005) [Two Pseudomonas syringae type III effectors inhibit RIN4-](#)  
254 [regulated basal defense in Arabidopsis](#). *Cell.* 121, 749-759.
- 255 17. Yoshida, K., Saitoh, H., Fujisawa, S., Kanzaki, H., Matsumura, H., Yoshida, K.,  
256 Tosa, Y., Chuma, I., Takano, Y., Win, J., Kamoun, S. and Terauchi, R. (2009)  
257 [Association genetics reveals three novel avirulence genes from the rice blast fungal](#)  
258 [pathogen Magnaporthe oryzae](#). *Plant Cell* 21, 1573-1591
- 259 18. Dangl, J.L. and Jones, J.D. (2001) [Plant pathogens and integrated defence responses](#)  
260 [to infection](#). *Nature* 411, 826-833.
- 261 19. van der Hoorn, R.A. and Kamoun, S. (2008) [From Guard to Decoy: a new model for](#)  
262 [perception of plant pathogen effectors](#). *Plant Cell* 20, 2009-2017

- 263 20. Afzal,, A.J., Kim, J.H. and Mackey, D. (2013) [The role of NOI-domain containing](#)  
264 [proteins in plant immune signaling](#). *BMC Genomics*. 14, 327.
- 265 21. Sabol, P., Kullich, I. and Zarsky, V. (2017) RIN4 recruits the exocyst subunit  
266 EXO70B1 to the plasma membrane. *J. Exp. Bot.* 68, 3253-3265.
- 267 22. Sarris, PF., Cevik, V., Dagdas, G., Jones, JDG. And Krasileva, KV. (2016)  
268 Comparative analysis of plant immune receptor architectures uncovers host proteins  
269 likely targeted by pathogens. *BMC Biol.* 14, 8.
- 270 23. Brabham, HJ., Hernández-Pinzón I., Hoden, S., Lorang, J. and Moscou, MJ. (2017)  
271 An ancestral integration at Mla is maintained as a *trans*-species polymorphism.  
272 BioRxiv.
- 273 24. Kanzaki, H., Yoshida, K., Saitoh, H., Fujisaki, K., Hirabuchi, A., Alaux, L., Fournier,  
274 E., Tharreau, D. and Terauchi, R. (2012) Arms race co-evolution of *Magnaporthe*  
275 *oryzae* AVR-*Pik* and rice *Pik* genes driven by their physical interactions. *Plant J.* 72,  
276 894–907.
- 277 25. Lee, SK., Song, MY., Seo, YS., Kim, HK., Ko, S., Cao, PJ., Suh, JP., Yi, G., Roh,  
278 JH., Lee, S., An, G., Hahn, TR., Wang, GL., Ronald, P. and Jeon, JS. (2009) Rice  
279 Pi5-mediated resistance to *Magnaporthe oryzae* requires the presence of two  
280 coiled-coil-nucleotide-binding-leucine-rich repeat genes. *Genetics*. 181, 1627–1638.  
281  
282  
283  
284

285 **Acknowledgements**

286 We thank members of our lab for discussions and general assistance. We also thank  
287 Matt Moscow and Helen Brabham, The Sainsbury Laboratory, UK for sharing their  
288 unpublished results. This work was supported by Science and Technology Research  
289 Promotion Program for Agriculture, Forestry, Fisheries and Food Industry, Japan,  
290 Grant-in-aid for MEXT (Scientific Research on Innovative Areas 23113009), JSPS  
291 KAKENHI (Grant No. 26850029) and JSPS KAKENHI 15H05779, the Biotechnology  
292 and Biological Sciences Research Council (BBSRC, UK, grants BB/J00453 and  
293 BB/P012574).

294

295 **Contributions**

296 K.F. S.K. and R.T. initiated, conceived and coordinated the project; K.F. identified and  
297 characterized NOI core motif in Pii-2; E.K. generated transgenic rice plants; K.F., Y.A.  
298 and H.U. prepared plamid vectors and performed fungal infection assay and RT-PCR.  
299 K.F. and K.I. performed yeast two hybrid assay. H.S., M.B., S.K. and R.T. supervised  
300 the project; K.F., A.B., S.K., and R.T. wrote the manuscript

301

302 **Competing interests**

303 The authors declare no competing financial interests.

304

305 **Corresponding author**

306 Co-correspondence to Ryohei Terauchi and Koki Fujisaki.



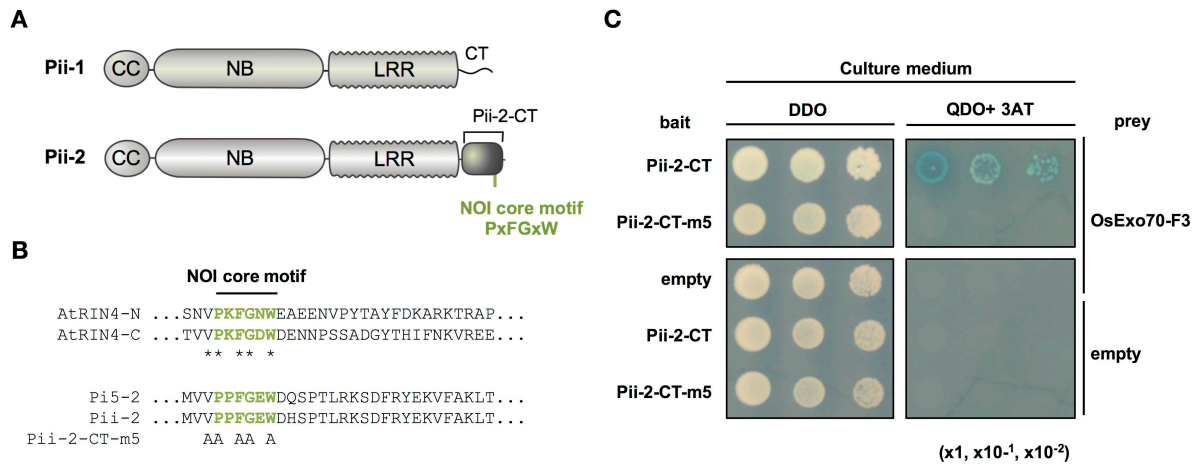

**Figure 1. OsExo70-F3 binds the NOI domain of Pii-2 C-terminal region (Pii-2-CT).**

(A) A schematic diagram of Pii-1 and Pii-2 NLRs. Coiled-coil (CC), nucleotide-binding (NB) and leucine rich repeat (LRR) domains are shown in light grey. OsExo70-F3 binds the C-terminus of the Pii-2 (Pii-2-CT) shown in dark grey (Pii-2-CT) that contains the core motif (PxFGxW) of NOI domain.

(B) Alignment of amino acid sequences around the NOI core motif of *Arabidopsis* RIN4, rice Pi5-2 and Pii-2 proteins. Residues of the NOI core motif are shown in green. Asterisks indicate conserved amino acids among *Arabidopsis* RIN4, Pi5-2 and Pii-2 proteins, which are substituted for Ala (A) in the Pii-2-CT-m5 mutant.

(C) Yeast two hybrid (Y2H) assay showing the interaction of OsExo70-F3 with the wild-type Pii-2-CT but not with the Pii-2-CT-m5 mutant. Protein interactions were tested in the yeast grown on Quadruple dropout (QDO) + 3AT medium (Trp<sup>-</sup>Leu<sup>-</sup>Ade<sup>-</sup>His<sup>-</sup>X $\alpha$  gal<sup>+</sup>+10 mM 3AT : right panels). Viability of all transformed yeast cells were demonstrated by growing them on double dropout (DDO) medium (Trp<sup>-</sup>Leu<sup>-</sup> : left panels). Yeast cells were spotted onto the media as tenfold dilution series (x1, x10<sup>-1</sup>, x10<sup>-2</sup>). Empty vectors (labeled as “empty”) were used as negative controls.

**A**

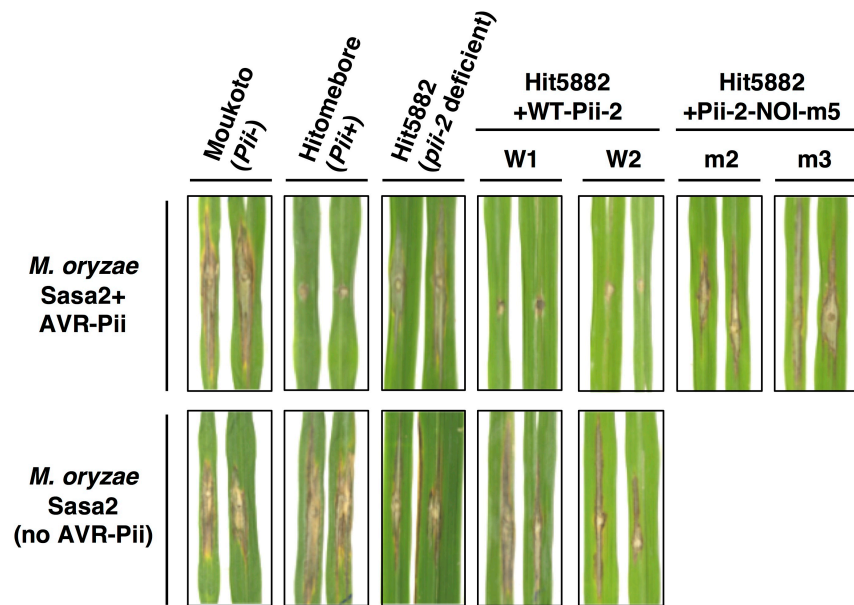

**B**

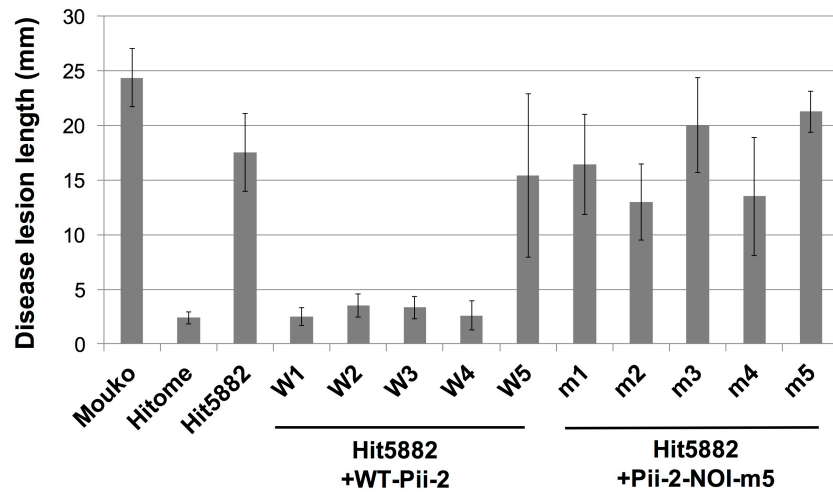

**C**

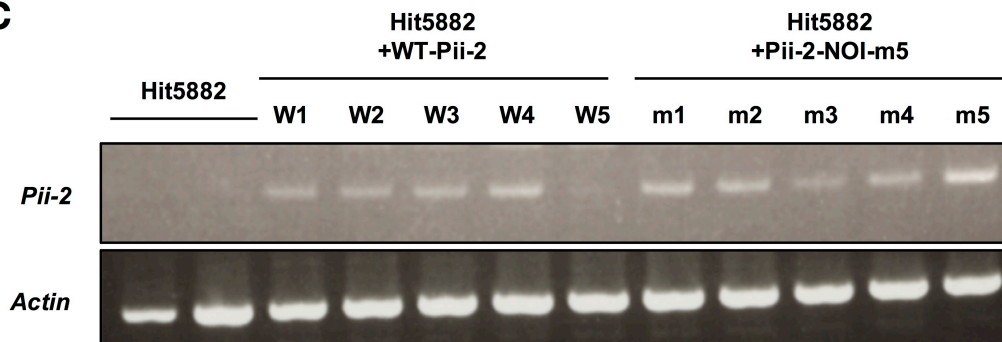

**Figure 2. AVR-Pii recognition of Pii requires Pii-2 NOI core motif.**

(A) Results of rice leaf blade spot inoculation assay of *M. oryzae*. Two *M. oryzae* isolates, with (transgenic Sasa2+AVR-Pii; top) or without (Sasa2; bottom) AVR-Pii were spot inoculated onto the leaves of rice lines Moukoto (Pii-), Hitomebore (Pii+), Hit5882, a *pii-2* Hitomebore mutant, and transgenic Hit5882 lines expressing a full-length cDNA of the wild-type *Pii-2* (Hit5882+WT-Pii-2) and those expressing the mutant version of *Pii-2* with m5 mutation in the NOI core motif (Hit5882+Pii-2-NOI-m5). Representative data of two line each of Hit5882+WT-Pii-2 (W1 and W2) and Hit5882+Pii-2-NOI-m5 (m2 and m3) are shown.

(B) Bar graphs showing disease lesion lengths after inoculation of an *M. oryzae* isolate Sasa2+AVR-Pii onto rice lines from panel A, labelled on the bottom. Here, five lines each from Hit5882+WT-Pii-2 (W1 to W5) and Hit5882+Pii-2-NOI-m5 (m1 to m5) were tested. The graph illustrates average lesion lengths and standard deviations from six inoculated spots per line.

(C) Expression of *Pii-2* transgenes in the tested rice plants. Messenger RNA from *Pii-2* transgene but not from intrinsic gene was specifically detected by semi-quantitative RT-PCR using a combination of primers derived from *Pii-2* gene and the binary vector sequences. Rice *Actin* was used as control.

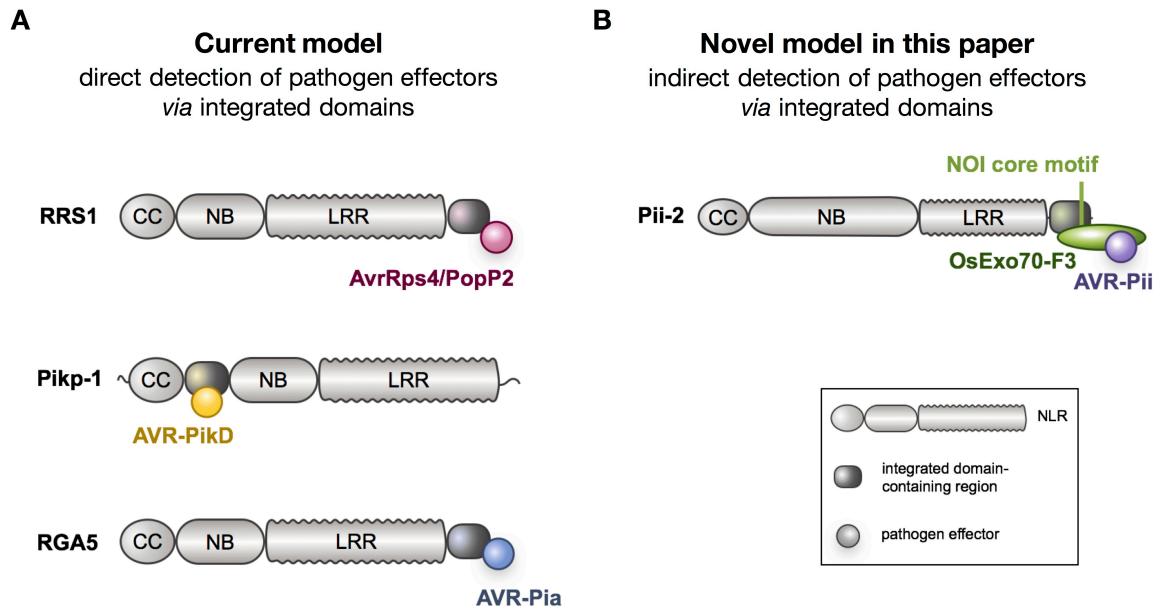

**Figure 3. A scheme showing possible roles of NLR-integrated domains in the effector recognition.**

(A) A widely accepted model of NLR-ID function. NLR directly interacts with pathogen effector *via* its integrated domain, and subsequently activates immune response. An *Arabidopsis* sensor NLR, RRS1 (top), has the WRKY domain at the C-terminus, and bacterial effectors AvrRps4/PopP2 directly bind to the RRS1 WRKY ID (ref. 5,6). The rice sensor NLRs, Pikp-1 (middle) and RGA5 (bottom), carry integrated HMA domain. Pathogen AVR effectors AVR-PikD and AVR-Pia, respectively, directly bind to their cognate HMA (ref. 7,8). In the current model (ref. 1,2), these sensor NLRs trigger ETI together with their NLR helpers.

(B) A novel model of ID function in indirect detection of pathogen effectors. Pii-2 is an NLR with an ID, NOI core motif (PxFGxW), residing in its C-terminal region. Pii-2-ID directly binds OsExo70-F3, which is necessary for AVR-Pii recognition. OsExo70-F3 also binds AVR-Pii. We propose that Pii-2 monitors OsExo70-F3, the status of which is altered upon binding of AVR-Pii. Thus, Pii-2 ID guards a host protein, OsExo70-F3, that is targeted by a pathogen effector, AVR-Pii.
